# Supplementary material for: Application and Diagnostic Performance of Two-Dimensional Shear Wave Elastography and Liver Fibrosis Scores in Adults with Class 3 Obesity
Source: MDPI journal article supplement (doi:10.3390/nu16010074), 2023-12-25
Supplement: s1 [file s1]

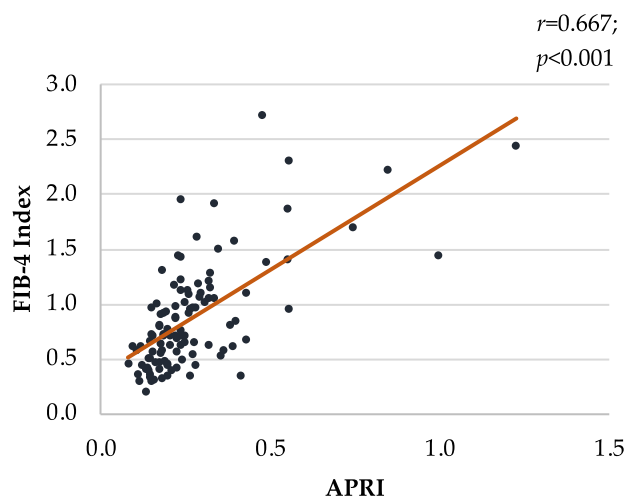

(a)

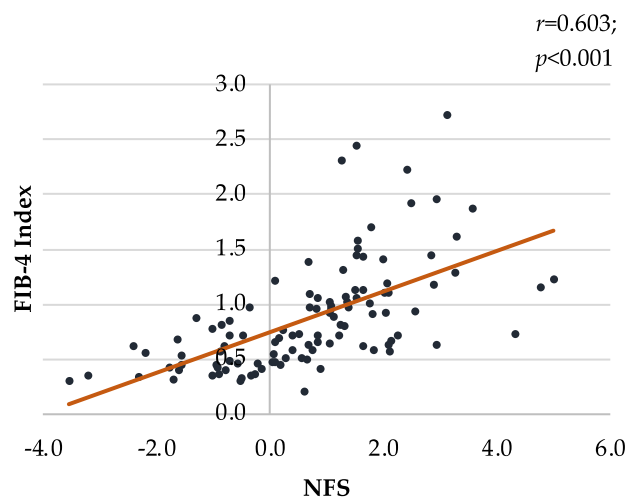

(b)

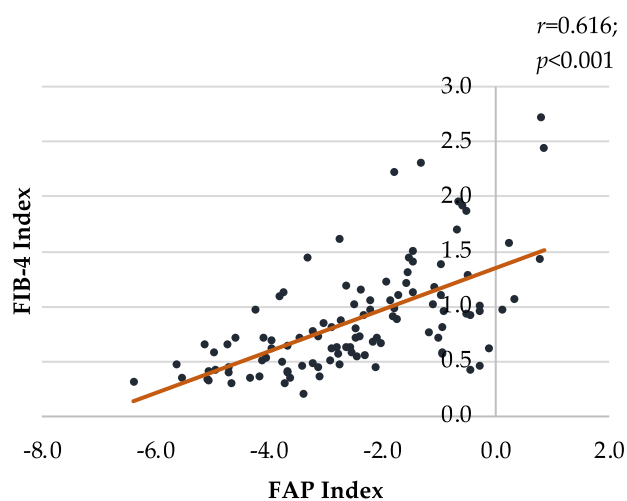

(c)

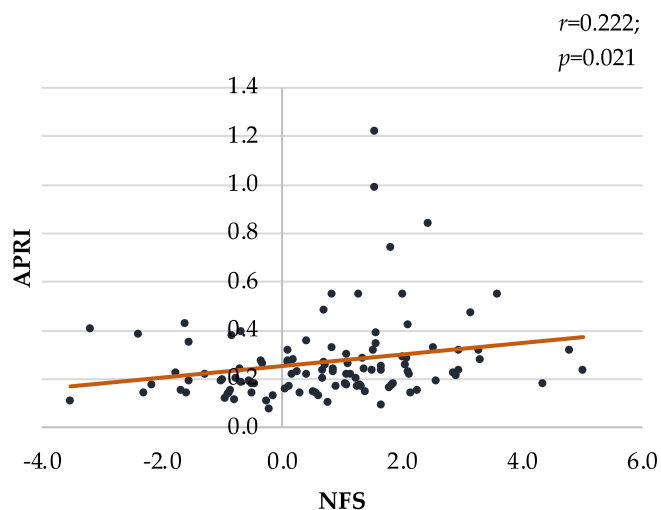

(d)

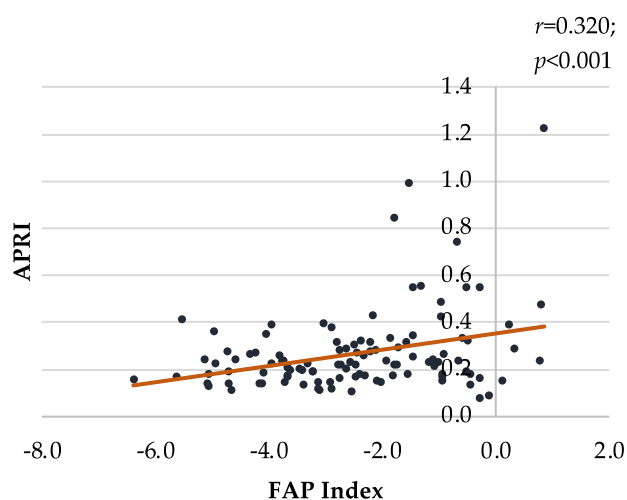

(e)

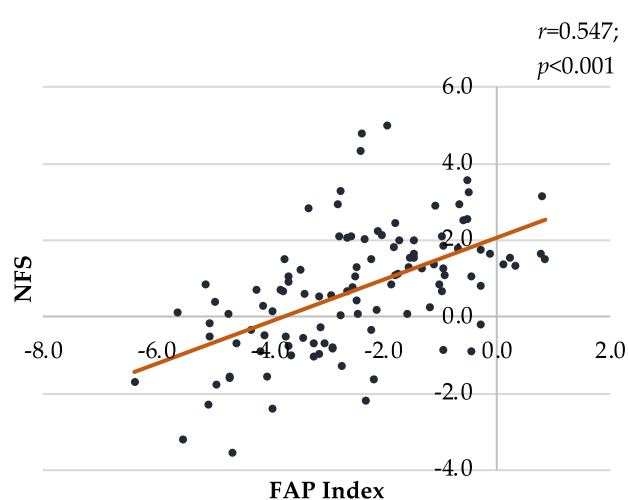

(f)

**Supplementary Figure S1.** Bland–Altman plot comparing non-invasive liver fibrosis screening tools in class 3 obesity. (a) FIB-4 Index and APRI; (b) FIB-4 Index and NFS; (c) FIB-4 Index and FAP Index; (d) APRI and NFS; (e) APRI and FAP Index; (f) NFS and FAP Index. APRI: AST (Aspartate Aminotransferase) to Platelet Ratio Index; EQI: ElastQ Imaging; FAP: Fibroblast Activation Protein; FIB-4: Fibrosis-4; NFS: NAFLD (Non-Alcoholic Fatty Liver Disease) Fibrosis Score.

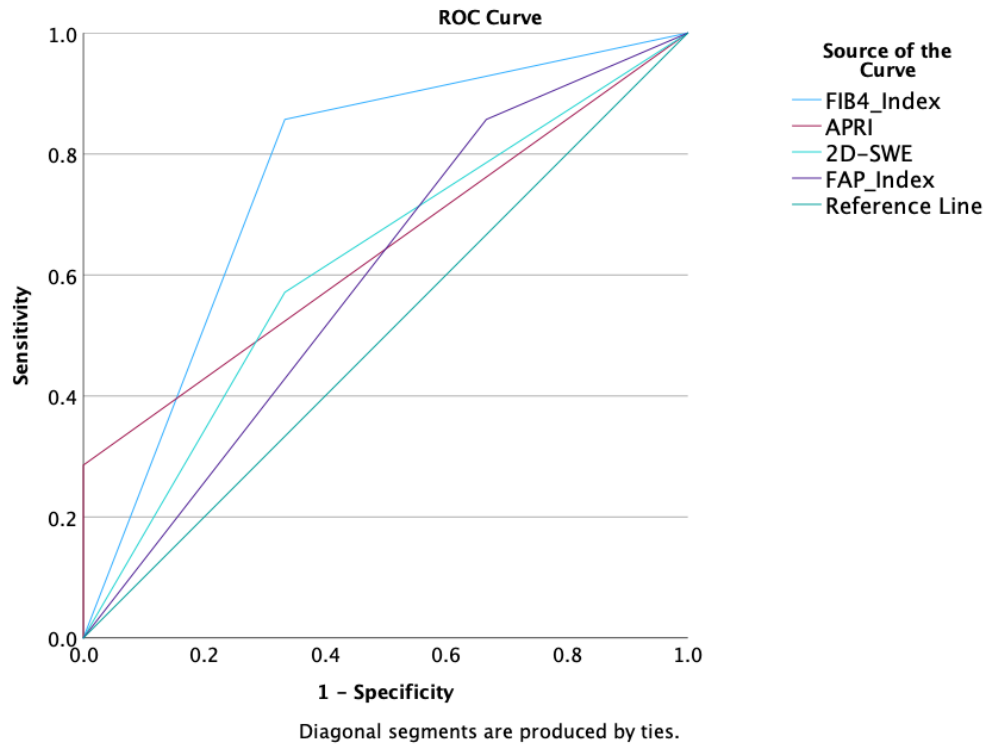

**Supplementary Figure S2.** Area under receiver operating characteristics curves (AUROC) of 2D-SWE, FIB-4 index, APRI, FAP index values for detecting risk of significant/advanced fibrosis ( $F \geq 2$ ). 2D-SWE: 2D-Shear Wave Elastography; APRI: AST (Aspartate Aminotransferase) to Platelet Ratio Index; FAP: Fibroblast Activation Protein; FIB-4: Fibrosis-4.
